# Supplementary material for: Particle-based artificial three-dimensional stem cell spheroids for revascularization of ischemic diseases
Source: PubMed Central journal article supplement — Sci Adv. 2020 May 6;6(19):eaaz8011. doi: 10.1126/sciadv.aaz8011 (PMC7202876; doi:10.1126/sciadv.aaz8011), 2020-05-06
Supplement: aaz8011_SM.pdf [file aaz8011_SM.pdf]

## Supplementary Materials for

### **Particle-based artificial three-dimensional stem cell spheroids for revascularization of ischemic diseases**

Ran Zhang, Wenya Luo, Yue Zhang, Dashuai Zhu, Adam C. Midgley, Hao Song, Anila Khalique, Haoqi Zhang, Jie Zhuang, Deling Kong\*, Xinglu Huang\*

\*Corresponding author. Email: [huangxinglu@nankai.edu.cn](mailto:huangxinglu@nankai.edu.cn) (X.H.); [kongdeling@nankai.edu.cn](mailto:kongdeling@nankai.edu.cn) (D.K.)

Published 6 May 2020, *Sci. Adv.* **6**, eaaz8011 (2020)  
DOI: 10.1126/sciadv.aaz8011

#### **This PDF file includes:**

Figs. S1 to S9  
Table S1

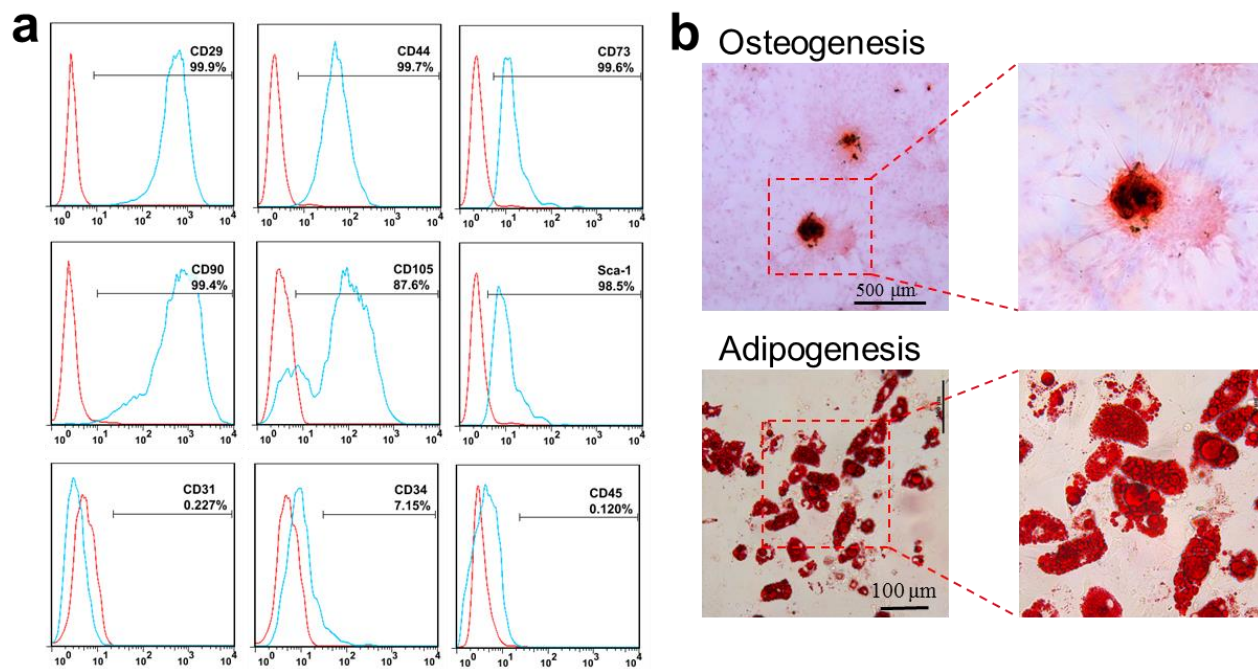

**Supplementary Fig. 1. Characterization of aMSC.** (a) Typical negative and positive surface marker expression in aMSC, as assessed by flow cytometry analysis. (b) Differentiation of aMSC into osteogenesis and adipogenesis using specific differentiation medium culture.

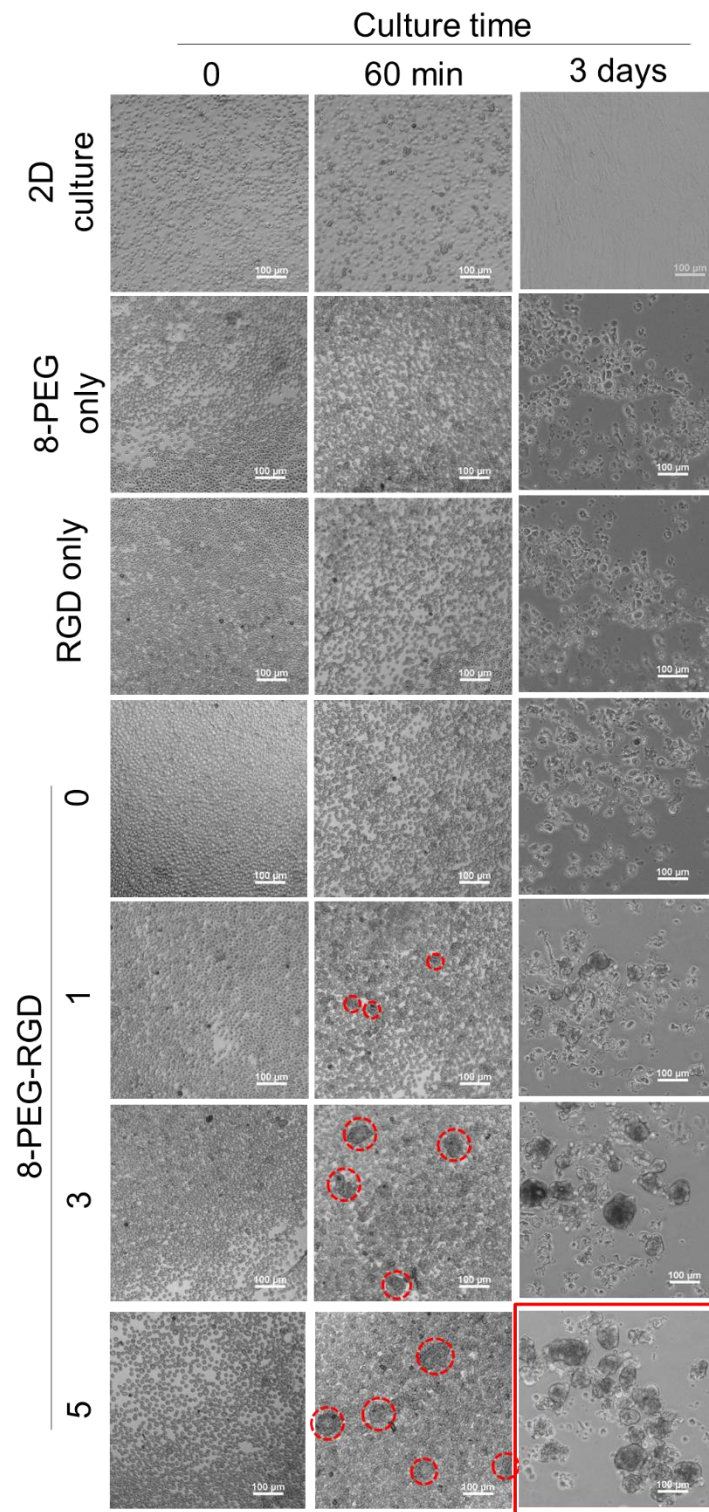

**Supplementary Fig. 2. Optimization of the formation of 3D SSPs.** Representative images of the formation of 3D SSPs in different treatments under microscopy observation.

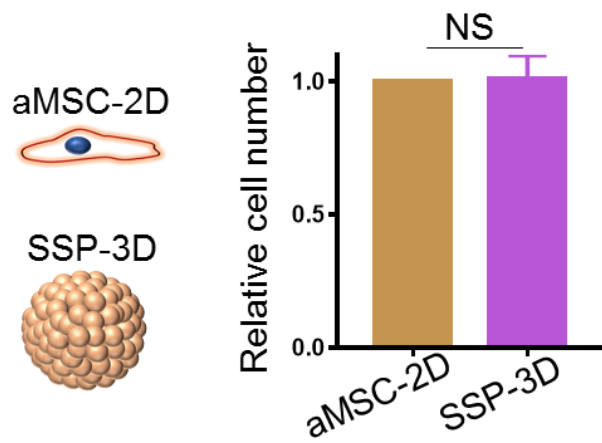

**Supplementary Fig. 3. Comparison of cell number of 2D-aMSC and 3D SSP at 5 days after culture in serum-free medium.** All data are presented as means  $\pm$ SEM. A two-tailed, unpaired Student's t test was used to compare between any two groups.

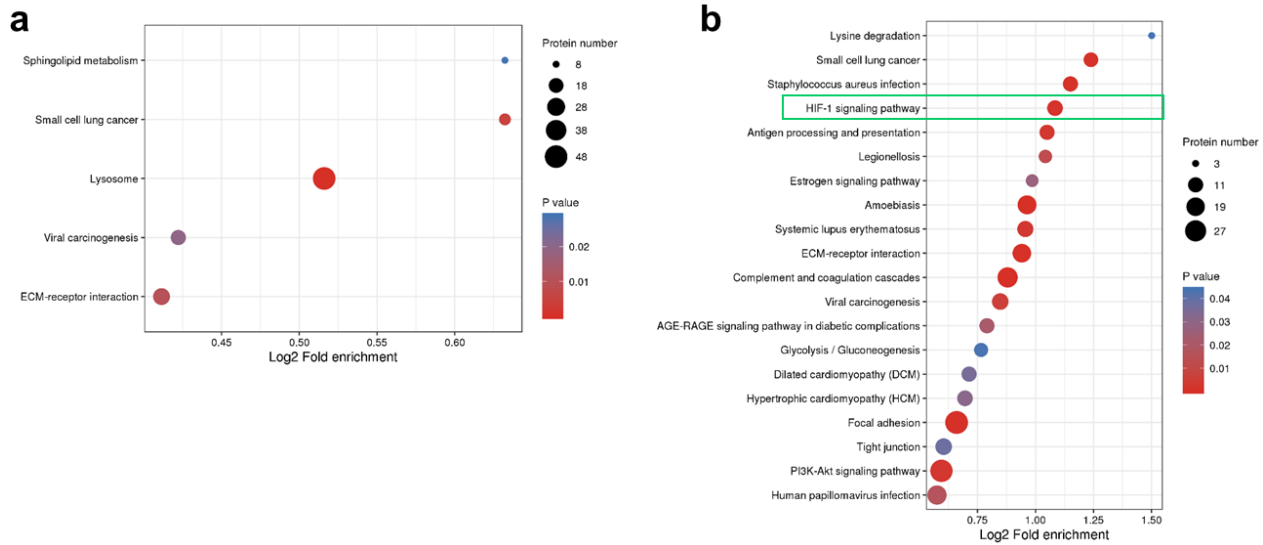

**Supplementary Fig. 4. Comparison between 2D-CF and 3D-CF by KEGG pathway based on LC-MS proteomic analysis.** The unsupervised enrichment analysis of KEGG pathway in (a) 2D-CF and (b) 3D-CF, respectively.

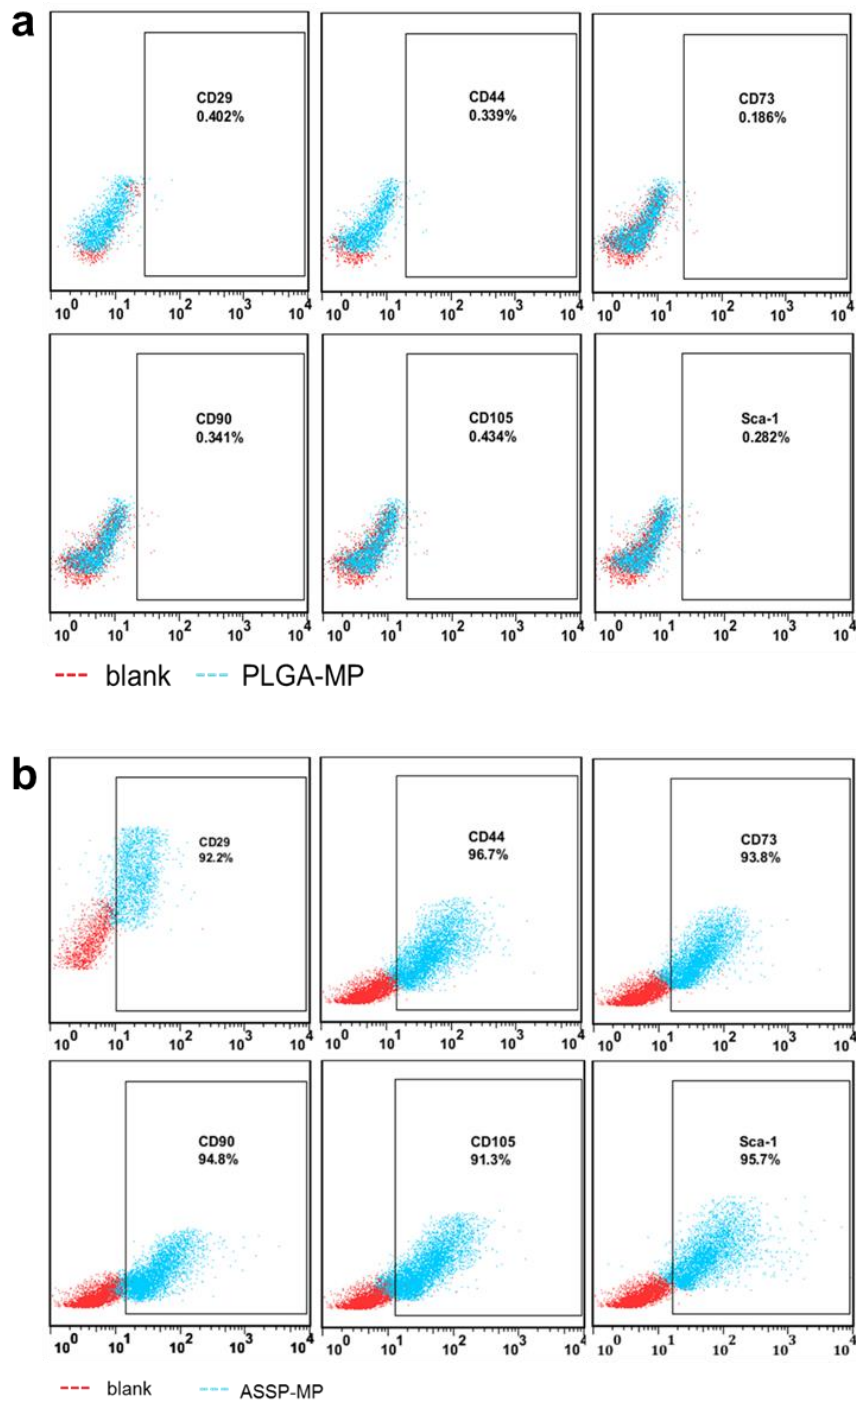

**Supplementary Fig. 5. Flow cytometry analysis of surface markers on the MP without or with membrane coating.** (a) Negative and (b) positive expression on PLGA-MP and ASSP-MP surface based on different surface markers analysis, respectively.

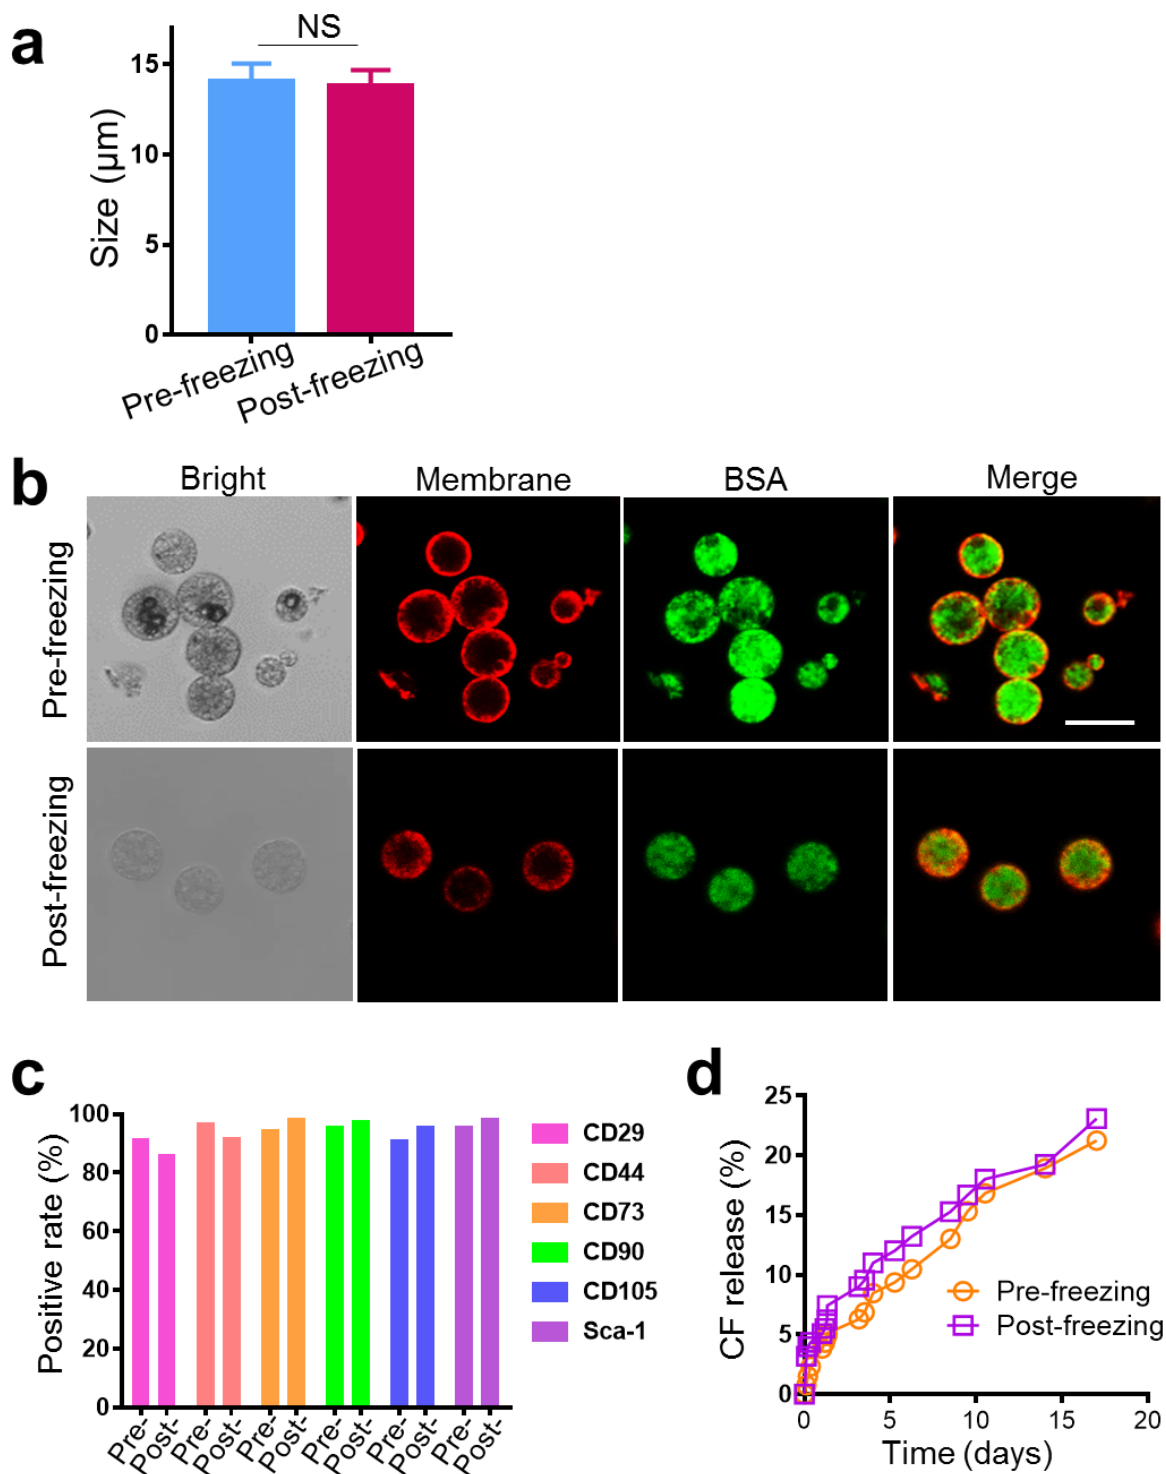

**Supplementary Fig. 6. Characterization of ASSPs before and after cryo-storage.** (a) Mean diameter of ASSP before and after freezing. (b) Confocal imaging of membrane structure in pre- and post-freezing samples, demonstrating cryopreservation does not affect membrane coating. Scale bar = 20 µm. (c) Surface marker expression of ASSP before and after freezing using flow cytometry analysis. (d) CF release kinetics from pre- and post-freezing samples. All data are presented as means  $\pm$  SEM. A two-tailed, unpaired Student's t test was used to compare between any two groups.



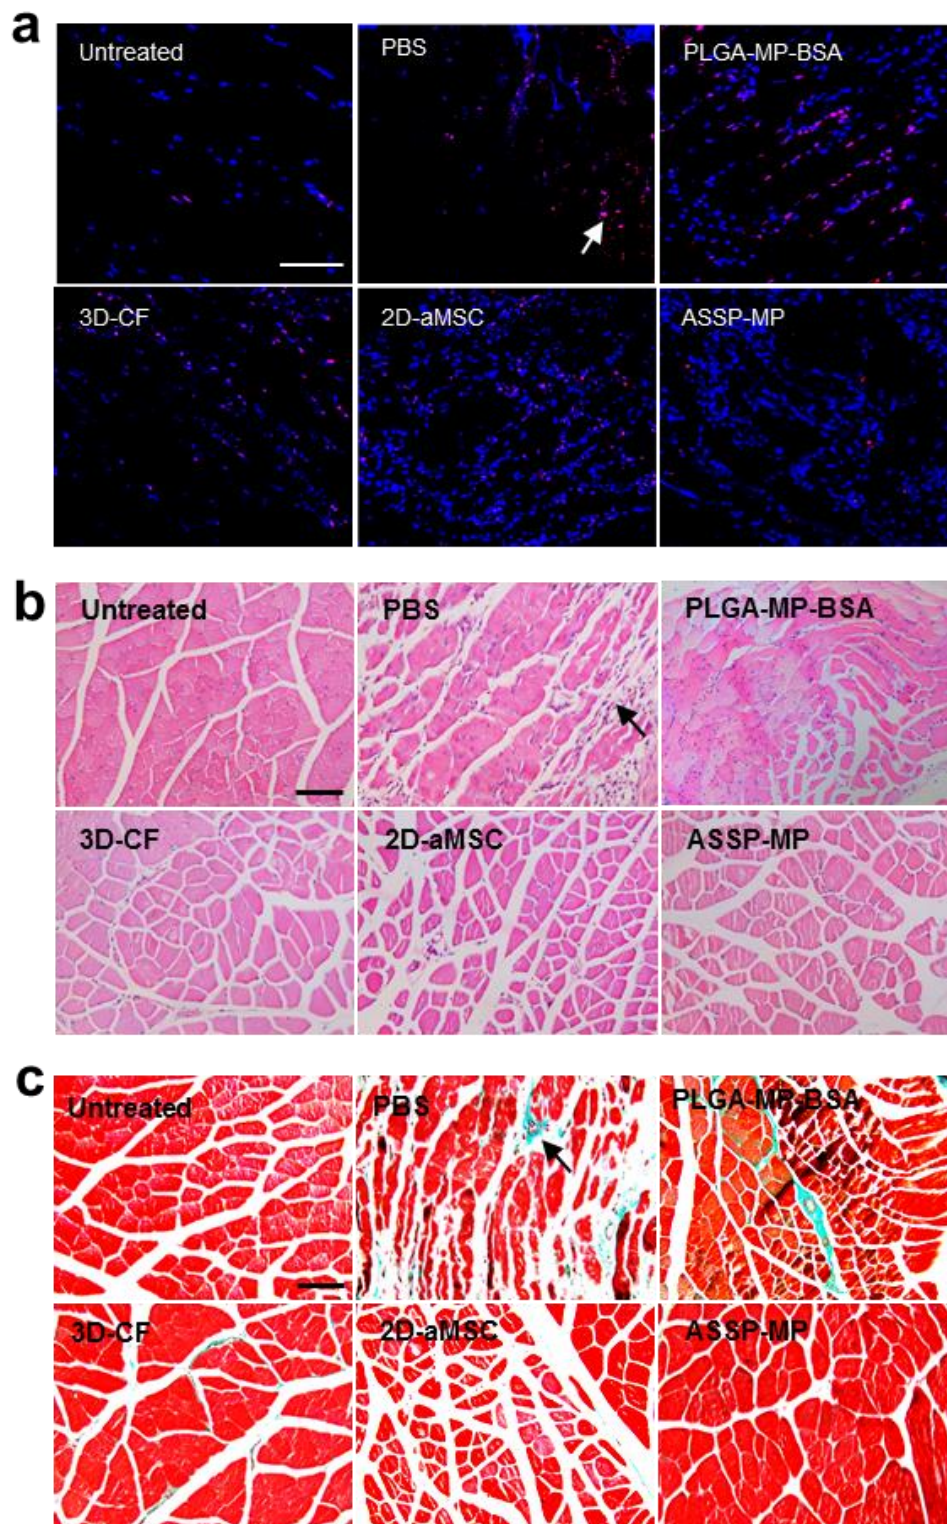

**Supplementary Fig. 7. Histological analysis of the isolated muscles from the mice subjected to acute HI model.** (a) Representative images of the apoptosis (arrow) of the samples by TUNEL immunostaining assay. Scale bar = 100 μm. (b) H&E staining of inflammation infiltration tissue (arrow) without or with different treatments. Scale bar = 100 μm. (c) Masson's Trichrome staining analysis of the fibrosis (arrow) in isolated muscles. Scale bar = 100 μm.



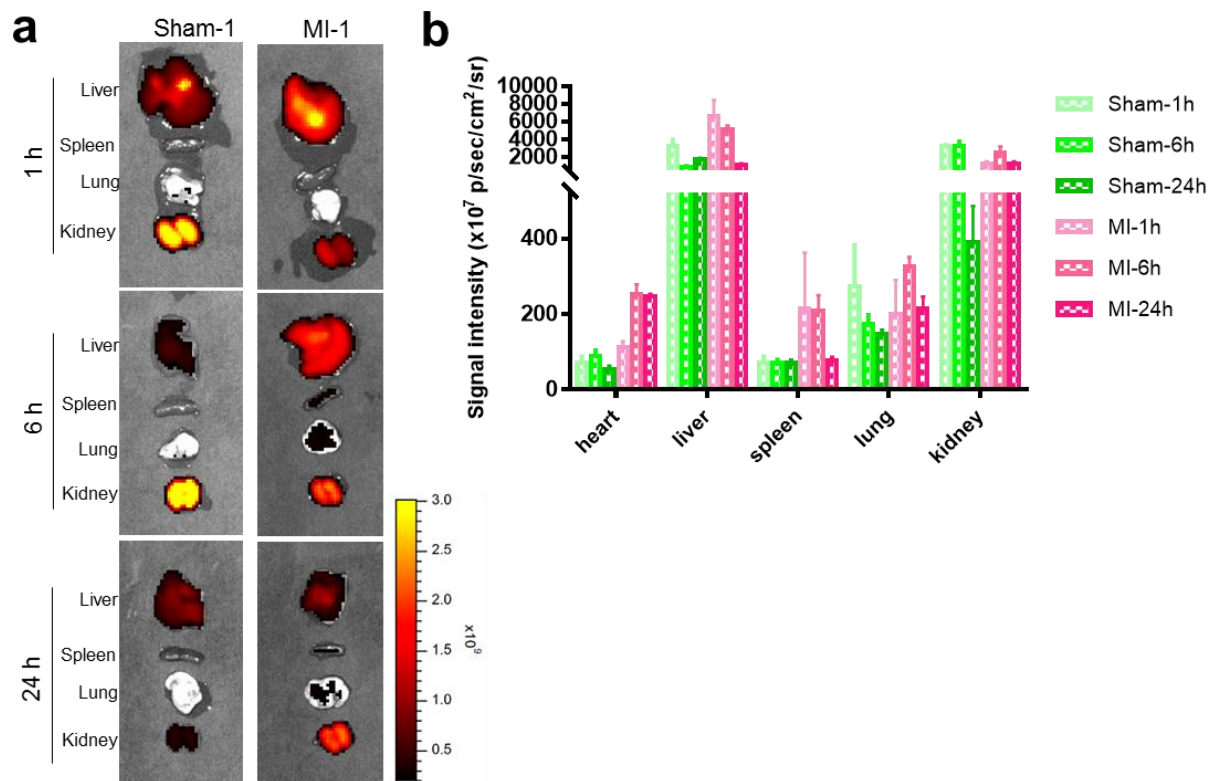

**Supplementary Fig. 8. Biodistribution of ASSP-NP following i.v. administration.** (a) IVIS fluorescence imaging and (b) quantification analysis of ASSP-NP in different organs at the indicated time points.

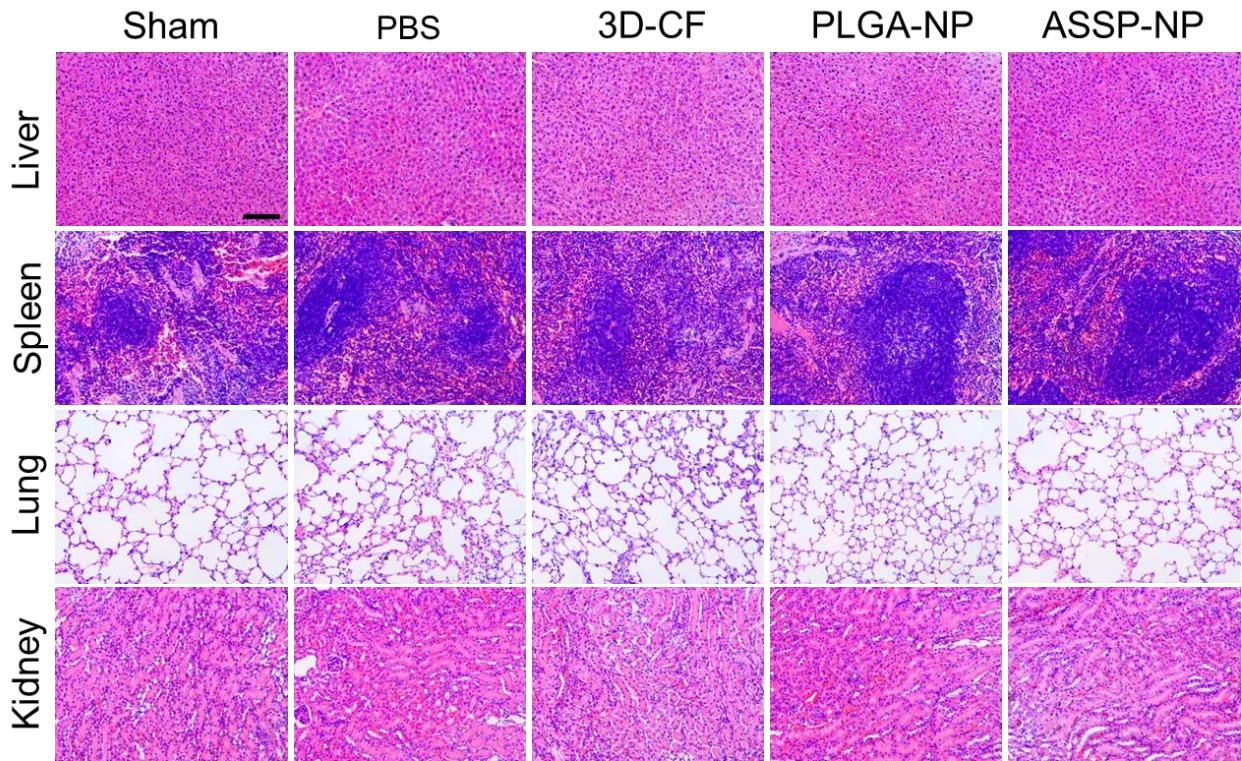

**Supplementary Fig. 9. Histopathological analysis of systemic toxicities in different organs.** The major organs without or with different treatments were harvested and assessed by H&E staining for variances in tissue architecture. Scale bar = 100  $\mu$ m.

**Table S1.** The sequences of primers for pro-angiogenic factors

|       | Prime sequences                                                  |
|-------|------------------------------------------------------------------|
| VEGF  | Forward: ACTGGACCCTGGCTTTAC<br>Reverse: TCTGCTCTCCTTCTGTCGTG     |
| PLGF  | Forward: CTTCTGAGTCGCTGTAGTGG<br>Reverse: TCCTTTCTGCCTTTGTCG     |
| IGF   | Forward: TGGATGCTCTTCAGTTCGTG<br>Reverse: GTCTTGGGCATGTCAGTGTG   |
| Ang-1 | Forward: ACAGGGACAGCAGGCAAAC<br>Reverse: GGCATCGAACCACCAACC      |
| PDGF  | Forward: ATCCAGGGAGCAGCGAGCCA<br>Reverse: CAGGGCCGCCTTGTCATGGG   |
| EGF   | Forward: GAGCCACCCTCATAATCACA<br>Reverse: CCCGAGTTCTTCTAAGTTCCT  |
| GADPH | Forward: TTGTCTCCTGCGACTTCAAC<br>Reverse: GTCATACCAGGAAATGAGCTTG |
